# Supplementary material
Source: ML conference proceedings conference paper supplement (https://proceedings.mlr.press/v70/zheng17c.html)
Supplement: Supplementary file [file zheng17c-supp.pdf]

---

## Supplementary Material for "Collect at Once, Use Effectively: Making Non-interactive Locally Private Learning Possible"

---

### 1. Omitted Proofs in Section 3

**Lemma 1** (Lemma 3 in Main Body). *Let  $\mathbf{x}_1, \mathbf{x}_2, \dots, \mathbf{x}_n \sim i.i.d.\mathcal{D}$  with  $\boldsymbol{\mu} = \mathbb{E}_{\mathcal{D}}[\mathbf{x}]$  and  $\text{supp}(\mathcal{D}) \subseteq \mathcal{B}(0, 1)$ . Let  $G$  and  $\{\mathbf{y}_i\}_{i=1}^n$  defined in the above procedure. For each of group  $S_j$  fixed, we have the following with probability  $2/3$ :*

$$\left\| \frac{1}{|S_j|} \sum_{\mathbf{y}_i \in S_j} \mathbf{y}_i - G\boldsymbol{\mu} \right\|_1 \leq O\left(\frac{p \log(nd)}{\epsilon \sqrt{|S_j|}}\right) \quad (1)$$

*Proof.* Apparently  $\frac{1}{|S_j|} \sum_{i \in S_j} \mathbf{r}_i \sim \mathcal{N}(0, \frac{2 \log(1.25/\delta)}{|S_j| \epsilon^2} I_d)$ .

So we have  $\left\| \frac{1}{|S_j|} \sum_{i \in S_j} \mathbf{r}_i \right\|_1 \leq O\left(\frac{p \log n}{\epsilon \sqrt{|S_j|}}\right)$  with probability  $\frac{1}{9}$ . We then turn to bound the loss incurred by random sample of data.

$$\begin{aligned} \mathbb{E} \left\| \boldsymbol{\mu} - \frac{1}{|S_j|} \sum_{i \in S_j} \mathbf{x}_i \right\|^2 &= \frac{1}{|S_j|} \sum_{l=1}^d \text{var}(x_{1l}) \\ &\leq \frac{1}{|S_j|} \sum_{l=1}^d \mathbb{E}[x_{1l}^2] \leq \frac{1}{|S_j|}. \end{aligned} \quad (2)$$

According to Markov Inequality, we have

$$\mathcal{P} \left\{ \left\| \boldsymbol{\mu} - \frac{1}{|S_j|} \sum_{i \in S_j} \mathbf{x}_i \right\|^2 \geq \frac{9}{|S_j|} \right\} \leq \frac{1}{9}$$

Given  $\mathbf{x}_1, \mathbf{x}_2, \dots, \mathbf{x}_n$  fixed under this event, we can easily derive upper bounds on entries of  $G(\boldsymbol{\mu} - \frac{1}{|S_j|} \sum_{i \in S_j} \mathbf{x}_i)$ : for  $\mathbf{g} \sim \mathcal{N}(0, I_d)$  and  $\mathbf{q} = \boldsymbol{\mu} - \frac{1}{|S_j|} \sum_{i \in S_j} \mathbf{x}_i$ , we have  $|\mathbf{g}^T \mathbf{q}| \leq 12 \sqrt{\frac{\log d}{|S_j|}}$  with probability  $1 - \frac{1}{9d}$ . By union bound we have the following with probability  $\frac{2}{9}$ :

$$\left\| G(\boldsymbol{\mu} - \frac{1}{|S_j|} \sum_{i \in S_j} \mathbf{x}_i) \right\|_1 \leq O\left(\sqrt{\frac{p \log d}{|S_j|}}\right).$$

Putting the two inequalities together using union bound, we get the result.  $\square$

**Lemma 2** (Lemma 6 in Main Body). *Under the assumptions made in Section 3.2, given projection matrix  $\Phi$ , with*

*high probability over the randomness of private mechanism, we have*

$$\bar{L}(\mathbf{w}^{priv}; \bar{X}, \mathbf{y}) - \bar{L}(\hat{\mathbf{w}}^*; \bar{X}, \mathbf{y}) \leq \tilde{O}\left(\sqrt{\frac{m}{n\epsilon^2}}\right) \quad (3)$$

*Proof.* Note, once we prove the uniform convergence of  $|\hat{L}(\mathbf{w}; Z, \mathbf{v}) - \bar{L}(\mathbf{w}; \bar{X}, \mathbf{y})| \leq O\left(\sqrt{\frac{m}{n\epsilon^2}}\right)$  for any  $\mathbf{w} \in \mathcal{C}$ , then the conclusion holds directly. Now, we will prove the uniform convergence. Note  $Z = \bar{X} + E$ , where  $E \in \mathbb{R}^{n \times m}$ , and each entry  $e_{ij} \sim \mathcal{N}(0, \sigma^2)$ ,  $\mathbf{v} = \mathbf{y} + \mathbf{r}$ , where  $\mathbf{r} \sim \mathcal{N}(0, \sigma^2 I_n)$ . Denote  $\bar{\mathbf{w}} = \Phi^T \mathbf{w}$ .

$$\begin{aligned} & \left| \hat{L}(\mathbf{w}; Z, \mathbf{v}) - \bar{L}(\mathbf{w}; \bar{X}, \mathbf{y}) \right| \\ &= \left| \frac{1}{2n} \bar{\mathbf{w}}^T (Q - \bar{X}^T \bar{X}) \bar{\mathbf{w}} - \frac{1}{n} (\mathbf{v}^T Z \bar{\mathbf{w}} - \mathbf{y}^T \bar{X} \bar{\mathbf{w}}) \right| \\ &\leq \frac{1}{2n} \|Q - \bar{X}^T \bar{X}\|_2 \|\bar{\mathbf{w}}\|_2^2 + \frac{1}{n} |\mathbf{v}^T Z \bar{\mathbf{w}} - \mathbf{y}^T \bar{X} \bar{\mathbf{w}}| \\ &\leq \frac{1}{2n} \|Q - \bar{X}^T \bar{X}\|_F \|\bar{\mathbf{w}}\|_2^2 + \frac{1}{n} |\mathbf{v}^T Z \bar{\mathbf{w}} - \mathbf{y}^T \bar{X} \bar{\mathbf{w}}| \\ &\leq \frac{1}{2n} \|Z^T Z - n\sigma^2 I_m - \bar{X}^T \bar{X}\|_F \|\bar{\mathbf{w}}\|_2^2 + \frac{1}{n} |\mathbf{v}^T Z \bar{\mathbf{w}} - \mathbf{y}^T \bar{X} \bar{\mathbf{w}}| \\ &\leq \frac{1}{2n} \|E^T E - n\sigma^2 I_m\|_F \|\bar{\mathbf{w}}\|_2^2 + \frac{1}{n} \|\bar{X}^T E\|_F \|\bar{\mathbf{w}}\|_2^2 + \\ &\quad \frac{1}{n} (\|E^T \mathbf{y}\|_2 + \|\bar{X}^T \mathbf{r}\|_2 + \|E^T \mathbf{r}\|_2) \|\bar{\mathbf{w}}\|_2 \end{aligned}$$

From the property of random projection, we know  $\|\bar{\mathbf{w}}\|_2 \leq 1$  with high probability. Besides, as each entry in  $E$  is i.i.d. Gaussian, and  $\mathbb{E}[E^T E] = n\sigma^2 I_m$ , thus we have  $\frac{1}{2n} \|E^T E - n\sigma^2 I_m\|_2 \leq O\left(\sigma \sqrt{\frac{\log m}{n}}\right)$  with high probability according to lemma 3, hence  $\frac{1}{2n} \|E^T E - n\sigma^2 I_m\|_F \leq O\left(\sigma \sqrt{\frac{m \log m}{n}}\right)$  with high probability.

As  $\frac{1}{n^2} \|\bar{X}^T E\|_F^2 = \frac{1}{n^2} \sum_{j=1}^m (\sum_{i=1}^m (\mathbf{q}_j^T \mathbf{e}_i)^2)$ , where  $\mathbf{q}_j, \mathbf{e}_i$  are the  $j$ -th and  $i$ -th column of  $\bar{X}$  and  $E$  respectively. For each  $j \in [m]$ ,  $\frac{1}{n^2} \sum_{i=1}^m (\mathbf{q}_j^T \mathbf{e}_i)^2$  obeys Chi-square distribution (with some scaling), thus with high probability,  $\frac{1}{n^2} \sum_{i=1}^m (\mathbf{q}_j^T \mathbf{e}_i)^2 \leq O\left(\frac{m \|\mathbf{q}_j\|^2 \sigma^2}{n^2}\right)$ . Therefore, by union bound, we have  $\frac{1}{n^2} \sum_{j=1}^m (\sum_{i=1}^m (\mathbf{q}_j^T \mathbf{e}_i)^2) \leq O\left(\frac{m \sum_j \|\mathbf{q}_j\|^2 \sigma^2}{n^2}\right) = O\left(\frac{m \sigma^2}{n}\right)$ , as  $\sum_j \|\mathbf{q}_j\|^2 =$

$\|\bar{X}\|_F^2 \leq n$ . Hence, there is  $\frac{1}{n} \|\bar{X}^T E\|_F \leq O\left(\sqrt{\frac{m\sigma^2}{n}}\right)$  with high probability. Using similar argument, we have  $\frac{1}{n} \|\bar{E}^T \mathbf{y}\|_2 \leq O\left(\sqrt{\frac{m\sigma^2}{n}}\right)$ ,  $\frac{1}{n} \|\bar{E}^T \mathbf{r}\|_2 \leq O\left(\sqrt{\frac{m\sigma^2}{n}}\right)$  with high probability. For  $\frac{1}{n} \|\bar{X}^T \mathbf{r}\|_2$ , according to matrix concentration inequality (Theorem 4.1.1 in (Tropp et al., 2015)), we have  $\frac{1}{n} \|\bar{X}^T \mathbf{r}\|_2 \leq O\left(\frac{1}{\sqrt{n}}\right)$ .

Combine all these results together, we obtain the desired conclusion.  $\square$

**Lemma 3** ((Vershynin, 2009)). *Suppose  $\mathbf{x} \in \mathbb{R}^d$  be a random vector satisfies  $\mathbb{E}[\mathbf{x}\mathbf{x}^T] = I_d$ . Denote  $\|\mathbf{x}\|_{\phi_1} = M$ , where  $\|\cdot\|_{\psi_1}$  represents Orlicz  $\psi_1$ -norm. Let  $\mathbf{x}_1, \dots, \mathbf{x}_n$  be independent copies of  $\mathbf{x}$ , then for every  $\epsilon \in (0, 1)$ , we have*

$$\Pr\left(\left\|\frac{1}{n} \sum_{i=1}^n \mathbf{x}_i \mathbf{x}_i^T - I_d\right\|_2 > \epsilon\right) \leq de^{-n\epsilon^2/4M^2}$$

**Theorem 1** (Theorem 3 in Main Body). *Under the assumption in this section, set  $m = \Theta\left(\sqrt{n\epsilon^2 \log d}\right)$  for  $\beta > 0$ , then with high probability, there is*

$$L(\mathbf{w}^{priv}) - L(\mathbf{w}^*) = \tilde{O}\left(\left(\frac{\log d}{n\epsilon^2}\right)^{1/4}\right)$$

*Proof.* On one hand,

$$\begin{aligned} & L(\mathbf{w}^{priv}) - L(\mathbf{w}^*) \\ &= L(\mathbf{w}^{priv}) - \bar{L}(\mathbf{w}^{priv}) + \bar{L}(\mathbf{w}^{priv}) - \bar{L}(\hat{\mathbf{w}}^*) \\ &\quad + \bar{L}(\hat{\mathbf{w}}^*) - \bar{L}(\mathbf{w}^*) + \bar{L}(\mathbf{w}^*) - L(\mathbf{w}^*) \\ &\leq [L(\mathbf{w}^{priv}) - \bar{L}(\mathbf{w}^{priv}) + \bar{L}(\mathbf{w}^*) - L(\mathbf{w}^*)] \\ &\quad + \bar{L}(\mathbf{w}^{priv}) - \bar{L}(\hat{\mathbf{w}}^*) \\ &\leq G[\max_i \{|\langle \mathbf{w}^{priv}, \mathbf{x}_i \rangle - \langle \Phi^T \mathbf{w}^{priv}, \Phi^T \mathbf{x}_i \rangle|\} \\ &\quad + \max_i \{|\langle \mathbf{w}^*, \mathbf{x}_i \rangle - \langle \Phi^T \mathbf{w}^*, \Phi^T \mathbf{x}_i \rangle|\}] \\ &\quad + [\bar{L}(\mathbf{w}^{priv}) - \bar{L}(\hat{\mathbf{w}}^*)] \end{aligned} \quad (4)$$

(where  $G$  is the Lipschitz constant)

On the other hand, for  $\forall \mathbf{w} \in \mathcal{C}, \forall \mathbf{x} \in D$ , there is

$$\begin{aligned} & |\langle \mathbf{w}, \mathbf{x} \rangle - \langle \Phi^T \mathbf{w}, \Phi^T \mathbf{x} \rangle| \\ &= \left| \frac{\|\Phi^T(\mathbf{w}+\mathbf{x})\|_2^2 - \|\Phi^T(\mathbf{w}-\mathbf{x})\|_2^2}{4} - \frac{\|\mathbf{w}+\mathbf{x}\|_2^2 - \|\mathbf{w}-\mathbf{x}\|_2^2}{4} \right| \\ &\leq \left| \frac{\|\Phi^T(\mathbf{w}+\mathbf{x})\|_2^2 - \|\mathbf{w}+\mathbf{x}\|_2^2}{4} \right| + \left| \frac{\|\Phi^T(\mathbf{w}-\mathbf{x})\|_2^2 - \|\mathbf{w}-\mathbf{x}\|_2^2}{4} \right| \end{aligned}$$

According to the results of random projection w.r.t. additive error (Dirksen, 2016), we know with high probability, there is  $|\langle \mathbf{w}, \mathbf{x} \rangle - \langle \Phi^T \mathbf{w}, \Phi^T \mathbf{x} \rangle| \leq O\left(\sqrt{\frac{\log d}{m}}\right)$ , for

$\forall \mathbf{w} \in \mathcal{C}, \forall \mathbf{x} \in D$ . Therefore, the first term in equation (4) is less than  $O\left(\sqrt{\frac{\log d}{m}}\right)$ .

From lemma 2, we know  $\bar{L}(\hat{\mathbf{w}}^{priv}) - \bar{L}(\hat{\mathbf{w}}^*) \leq \tilde{O}\left(\sqrt{\frac{m}{n\epsilon^2}}\right)$  holds with high probability. Combine these two inequalities, it is easy to determine the optimal  $m$ , then obtain the conclusion.  $\square$

**Corollary 1** (Corollary 2 in Main Body). *Algorithm LDP kernel mechanism satisfies  $(\epsilon, \delta)$ -LDP, and with high probability, there is*

$$\begin{aligned} L_{\hat{H}}(\hat{\mathbf{w}}^{priv}) - L_H(f^*) &\leq \tilde{O}\left(\left(\frac{d}{n\epsilon^2}\right)^{1/4}\right) \\ \sup_{\mathbf{x} \in \mathcal{X}} |\Phi(\mathbf{x})^T f^* - (\hat{\Phi}(\mathbf{x}))^T \hat{\mathbf{w}}^{priv}| &\leq \tilde{O}\left(\left(\frac{d}{n\epsilon^2}\right)^{1/8}\right) \end{aligned}$$

*Proof.* Algorithm satisfies local privacy is obvious. For excess risk, as  $L_{\hat{H}}(\hat{\mathbf{w}}^{priv}) - L_H(f^*) = L_{\hat{H}}(\hat{\mathbf{w}}^{priv}) - L_{\hat{H}}(g^*) + L_{\hat{H}}(g^*) - L_H(f^*)$ , follow nearly the same proof of lemma 5 of sparse linear regression, we have  $L_{\hat{H}}(\hat{\mathbf{w}}^{priv}) - L_{\hat{H}}(g^*) \leq \tilde{O}\left(\sqrt{\frac{d_p}{n\epsilon^2}}\right)$ . On the other hand, nearly borrow the proof of Lemma 17 in (Rubinstein et al., 2012) and property of RRF, we have

$$L_{\hat{H}}(g^*) - L_H(f^*) \leq \tilde{O}\left(\sqrt{\frac{d}{d_p}}\right)$$

Combine above two inequalities, and choose optimal  $d_p$  as  $\tilde{O}\left(\sqrt{dn\epsilon^2}\right)$ , we obtain the first inequality of the conclusion. Then combine lemma 7 in this paper, it is easy to obtain the second inequality.  $\square$

## 2. Omitted contents and proofs in Section 4

### 2.1. Relations between smooth generalized linear losses (SGLL) and generalized linear models (GLM)

Note that a model is called GLM, if for  $\mathbf{x}, \mathbf{w}^* \in \mathbb{R}^d$ , label  $y$  with respect to  $\mathbf{x}$  is given by a distribution which belongs to the exponential family:

$$p(y|\mathbf{x}, \mathbf{w}^*) = \exp\left(\frac{y\theta - b(\theta)}{\Phi} + c(y, \Phi)\right) \quad (5)$$

where  $\theta, \Phi$  are parameters, and  $b(\theta), c(y, \Phi)$  are known functions. Besides, there is an one-to-one continuous differentiable transformation  $g(\cdot)$  such that  $g(b'(\theta)) = \mathbf{x}^T \mathbf{w}^*$ .

According to the key equality  $g(b'(\theta)) = \mathbf{x}^T \mathbf{w}^*$ , usually we can obtain smooth function  $\theta = h_1(\mathbf{x}^T \mathbf{w}^*), b(\theta) = h_2(\mathbf{x}^T \mathbf{w}^*)$ , and what's more, univariate function

$h_i(x)$  ( $i = 1, 2$ ) satisfies the absolutely smooth property.

For such GLM, if we consider optimizing the expected negative logarithmic probability  $-\mathbb{E}_{(\mathbf{x}, y) \sim \mathcal{D}} \log p(\mathbf{x}, y; \mathbf{w})$ , once discarding unrelated terms to  $\mathbf{w}$ , we obtain the new population loss,  $L(\mathbf{w}) := \mathbb{E}_{(\mathbf{x}, y) \sim \mathcal{D}} \ell(\mathbf{w}; \mathbf{x}, y)$ , where  $\ell(\mathbf{w}; \mathbf{x}, y) = -y h_1(\mathbf{x}^T \mathbf{w}) + h_2(\mathbf{x}^T \mathbf{w})$ , exactly the form of smooth generalized linear loss defined in section 4. Hence our SGLL is a natural loss defined by GLM with additional smoothness assumptions.

## 2.2. Omitted proofs

**Lemma 4** (Lemma 8 in Main Body). *Given any  $\alpha > 0$ , by setting  $k = c \ln \frac{1}{\alpha}$ ,  $p = \lceil k + e\mu_2(k; r) \rceil$ , where  $c$  is a constant, we have  $\left\| \hat{f}_p(x) - f(x) \right\|_\infty \leq \alpha$ .*

*Proof.* As  $f, f', \dots, f^{(k-1)}$  are absolutely continuous over  $[-1, 1]$ , and  $\|f^{(k)}\|_T \leq \mu_1(k; r)\mu_2(k; r)^k$ , according to the results in (Trefethen, 2008), we have

$$\begin{aligned} \left\| \hat{f}_p(x) - f(x) \right\|_\infty &\leq \frac{2 \|f^{(k)}\|_T}{\pi k (p-k)^k} \\ &\leq \frac{2\mu_1(k; r)}{\pi k e^k} \end{aligned} \quad (6)$$

It is easy to see there exists  $c > 0$ , such that the term (6) is less than  $\alpha$  with chosen  $k$ , hence the conclusion holds.  $\square$

**Lemma 5** (Lemma 9 in Main Body). *For any  $\gamma > 0$ , setting  $k = c \ln \frac{4r}{\gamma}$ ,  $p = \lceil k + 2\mu_2(k; r) \rceil$ , then algorithm 7 outputs a  $(\gamma, \beta, \sigma)$  stochastic oracle, where  $\sigma = \tilde{O}\left(\sigma_0 + \gamma + \frac{p^{2p+1}(4r)^{p+1}}{\epsilon^{p+2}}\right)$ .*

*Proof.* According to lemma 4, we know the approximation error,  $|\hat{m}(\mathbf{w}; \mathbf{x}, y) - m(\mathbf{w}; \mathbf{x}, y)| \leq \frac{\gamma}{2r}$ . For any fixed  $(\mathbf{x}, y)$ , from the construction of stochastic inexact gradient oracle, there is  $\mathbb{E}[\tilde{G}(\mathbf{w}; b) | \mathbf{x}, y] = \hat{G}(\mathbf{w}; \mathbf{x}, y)$ . Denote  $\hat{g}(\mathbf{w}) = \mathbb{E}_{(\mathbf{x}, y) \sim \mathcal{D}}[\hat{G}(\mathbf{w}; \mathbf{x}, y)]$ , thus we have

$$\begin{aligned} \mathbb{E} \left[ \left\| \tilde{G}(\mathbf{w}; b) - \hat{g}(\mathbf{w}) \right\|^2 \right] &= \mathbb{E} \left[ \left\| \tilde{G}(\mathbf{w}; b) - \hat{G}(\mathbf{w}; \mathbf{x}, y) \right\|^2 \right] \\ &\quad + \mathbb{E} \left[ \left\| \hat{G}(\mathbf{w}; \mathbf{x}, y) - \hat{g}(\mathbf{w}) \right\|^2 \right] \end{aligned}$$

For above two terms, combined with results given in lemma 6, we we obtain

$$\mathbb{E} \left[ \left\| \tilde{G}(\mathbf{w}; b) - g(\mathbf{w}) \right\|^2 \right] \leq \tilde{O} \left( \left( \frac{r(2rp)^{p+1}}{\epsilon^{p+2}} + \gamma + \sigma_0 \right)^2 \right)$$

As  $L(\mathbf{v}) - L(\mathbf{w}) - \hat{g}(\mathbf{w})^T(\mathbf{v} - \mathbf{w}) = L(\mathbf{v}) - L(\mathbf{w}) - g(\mathbf{w})^T(\mathbf{v} - \mathbf{w}) + (g(\mathbf{w}) - \hat{g}(\mathbf{w}))^T(\mathbf{v} - \mathbf{w})$ , and from the

approximation error, we know  $|(g(\mathbf{w}) - \hat{g}(\mathbf{w}))^T(\mathbf{v} - \mathbf{w})| \leq \frac{\gamma}{2}$ . What's more, as  $L(\mathbf{w})$  is convex and  $\beta$ -smooth, that is  $0 \leq L(\mathbf{v}) - L(\mathbf{w}) - g(\mathbf{w})^T(\mathbf{v} - \mathbf{w}) \leq \frac{\beta}{2} \|\mathbf{v} - \mathbf{w}\|^2$ . Combined these inequalities, we obtain

$$\begin{aligned} -\frac{\gamma}{2} &\leq L(\mathbf{v}) - L(\mathbf{w}) - \hat{g}(\mathbf{w})^T(\mathbf{v} - \mathbf{w}) \leq \frac{\beta}{2} \|\mathbf{v} - \mathbf{w}\|^2 + \frac{\gamma}{2} \\ \iff 0 &\leq L(\mathbf{v}) - (L(\mathbf{w}) - \frac{\gamma}{2}) - \hat{g}(\mathbf{w})^T(\mathbf{v} - \mathbf{w}) \leq \frac{\beta}{2} \|\mathbf{v} - \mathbf{w}\|^2 + \gamma \end{aligned}$$

Note the function value oracles in the stochastic oracle definition (either  $F_{\gamma, \beta, \sigma}(\cdot)$  or  $f_{\gamma, \beta, \sigma}(\cdot)$ ) do not play any role in the optimization algorithm, hence we can set it as  $L(\mathbf{w}) - \frac{\gamma}{2}$ , though we do not know how to calculate.  $\square$

**Lemma 6.** *Based on above statements, we have*

$$\begin{aligned} \mathbb{E} \left[ \left\| \tilde{G}(\mathbf{w}; b) - \hat{G}(\mathbf{w}; \mathbf{x}, y) \right\|^2 \right] &\leq \tilde{O} \left( \frac{p^{4p+2}(4r)^{2p+2}}{\epsilon^{2p+4}} \right) \\ \mathbb{E} \left[ \left\| \hat{G}(\mathbf{w}; \mathbf{x}, y) - \hat{g}(\mathbf{w}) \right\|^2 \right] &\leq (\gamma + \sigma_0)^2 \end{aligned}$$

*Proof.* First, we calculate the variance of each  $t_k$ ,  $\text{var}(t_j) \leq \prod_{i=j}^{j+1/2} (\text{var}(\mathbf{w}^T \mathbf{z}_i) + (\mathbb{E}[\mathbf{w}^T \mathbf{z}_i])^2) \leq \tilde{O} \left( \left( \frac{p(p+1)}{\epsilon} \right)^{2j} \right)$ .

Next, we upper bound the coefficient  $c_k$  (as it is the same for  $c_{1k}$  and  $c_{2k}$ , hence we use  $c_k$  for short). Note  $c_k = \sum_{m=k}^p a_m b_{mk}$ , where  $a_m$  is the coefficient of original function represented by Chebyshev basis,  $b_{mk}$  is the coefficient of order  $k$  monomial in Chebyshev basis  $T_m(x)$ , where  $0 \leq k \leq m$ . According to the formula of  $T_m(x)$  given in (Qazi & Rahman, 2007) and well-known Stirling's approximation, after some translation, we have

$$\begin{aligned} |b_{mk}| &\leq \max_{\theta \in (0, \frac{1}{2})} O \left( \sqrt{m} \cdot \left[ \frac{(1-\theta)^{1-\theta}}{\theta^\theta (1-2\theta)^{1-2\theta}} \right]^m \right) \\ &\leq O(\sqrt{m} 2^m) \end{aligned}$$

Besides, from the absolutely smooth property of  $h'_i(x)$  ( $i \in \{1, 2\}$ ) and the convergence results in (Trefethen, 2008), we have  $a_m \leq O\left(\frac{1}{m^2}\right)$ , thus  $c_k = \sum_{m=k}^p a_m b_{mk} \leq O(2^p)$ . Hence, there is

$$\begin{aligned} \text{var} \left[ (c_{2k} - c_{1k} z_y) t_k r^{k+1} \right] &\leq r^{2k+2} \mathbb{E} \left[ ((c_{2k} - c_{1k} z_y) t_k)^2 \right] \\ &\leq O \left( \frac{p^{4k+2} (4r)^{2p+2}}{\epsilon^{2k+2}} \right) \end{aligned}$$

As each  $(c_{2k} - c_{1k} z_y) t_k r^{k+1}$  is independent with each other (for different  $k$ ), which leads to

$$\text{var} \left[ \sum_{k=0}^p (c_{2k} - c_{1k} z_y) t_k r^{k+1} \right] \leq O \left( \frac{p^{4p+2} (4r)^{2p+2}}{\epsilon^{2p+2}} \right)$$

Moreover,  $\text{var}(z_0) \leq O\left(\frac{1}{\epsilon^2}\right)$ . Therefore,

$$\mathbb{E} \left[ \left\| \tilde{G}(\mathbf{w}; b) - \hat{G}(\mathbf{w}; \mathbf{x}, y) \right\|^2 \right] \leq \tilde{O} \left( \frac{p^{4p+2} (4r)^{2p+2}}{\epsilon^{2p+4}} \right)$$

For second inequality in the conclusion, there is

$$\begin{aligned} & \mathbb{E} \left[ \left\| \hat{G}(\mathbf{w}; \mathbf{x}, y) - \hat{g}(\mathbf{w}) \right\|^2 \right] \\ & \leq \mathbb{E} \left[ \left\| \hat{G}(\mathbf{w}; \mathbf{x}, y) - G(\mathbf{w}; \mathbf{x}, y) + G(\mathbf{w}; \mathbf{x}, y) - g(\mathbf{w}) + g(\mathbf{w}) - \hat{g}(\mathbf{w}) \right\|^2 \right] \\ & \leq \gamma^2 + \sigma_0^2 + 2\sigma_0\gamma = (\gamma + \sigma_0)^2 \end{aligned}$$

□

**Proposition 1.**  $f(x) = \ln(1 + e^{-x})$  is absolutely smooth with  $\mu_1(k; r) = r\sqrt{4k\pi^3}$ ,  $\mu_2(k; r) = \frac{rk}{e}$

*Proof.* For any  $r, k > 0$ , the absolutely continuous of  $f^{(k)}(rx)$  is obvious, now consider  $\|f^{(k+1)}(rx)\|_T$ :

$$\begin{aligned} \|f^{(k+1)}\|_T &= \int_{-1}^1 \frac{|f^{(k+2)}(rx)|}{\sqrt{1-x^2}} dx \\ &\leq \pi \|f^{(k+2)}(rx)\|_\infty \\ &\leq \pi r^{k+2} \left\| \sum_{j=1}^{k+1} (-1)^{k+j} A_{k+1, j-1} f^j (1-f)^{k+2-j} \right\|_\infty \\ &\leq \pi r^{k+2} \sum_{j=1}^{k+1} A_{k+1, j-1} \\ &\leq \pi (k+1)! r^{k+2} \\ &\leq \sqrt{4\pi^3} r^{k+2} (k+1)^{k+3/2} e^{-k-1} \\ &= r\sqrt{4\pi^3 (k+1)} \left( \frac{r(k+1)}{e} \right)^{k+1} \end{aligned}$$

□

**Theorem 2** (Theorem 6 in Main Body). For any  $\alpha > 0$ , set  $\gamma = \frac{\alpha}{2}$ ,  $k = c \ln \frac{4r}{\gamma}$ ,  $p = \lceil k + 2\mu_2(k; r) \rceil$ , if  $n > O\left(\left(\frac{8r}{\alpha}\right)^{4r \ln \ln(8r/\alpha)} \left(\frac{4r}{\epsilon}\right)^{2cr \ln(8r/\alpha)+2} \left(\frac{1}{\alpha^2 \epsilon^2}\right)\right)$ , using algorithms 6,7,8, then we have  $L(\mathbf{w}^{priv}) - L(\mathbf{w}^*) \leq \alpha$ .

*Proof.* According to lemma 10 in main body, with a  $(\gamma, \beta, \sigma)$  stochastic oracle, SIGM algorithm converges with rate  $O\left(\frac{\sigma}{\sqrt{n}} + \gamma\right)$ . In order to have  $O\left(\frac{\sigma}{\sqrt{n}} + \gamma\right) \leq \alpha$ , it suffices if  $n > O\left(\frac{p^{4p+2} (4r)^{2p+2}}{\alpha^2 \epsilon^{2p+4}}\right) = O\left(\left(\frac{8r}{\alpha}\right)^{4r \ln \ln(8r/\alpha)} \left(\frac{4r}{\epsilon}\right)^{2cr \ln(8r/\alpha)+2} \left(\frac{1}{\alpha^2 \epsilon^2}\right)\right)$ , as  $\sigma = O\left(\frac{p^{2p+1} (4r)^{p+1}}{\epsilon^{p+2}}\right)$  according to lemma 5 (ignoring negligible  $\sigma_0, \gamma$ ). □

## References

- Dirksen, Sjoerd. Dimensionality reduction with subgaussian matrices: a unified theory. *Foundations of Computational Mathematics*, 16(5):1367–1396, 2016.
- Qazi, MA and Rahman, QI. Some coefficient estimates for polynomials on the unit interval. *Serdica Mathematical Journal*, 33(4):449p–474p, 2007.
- Rubinstein, B., Bartlett, P. L., Huang, L., and Taft, N. Learning in a large function space: Privacy-preserving mechanisms for svm learning. *Journal of Privacy and Confidentiality*, 4(1):4, 2012.
- Trefethen, Lloyd N. Is gauss quadrature better than clenshaw–curtis? *SIAM review*, 50(1):67–87, 2008.
- Tropp, Joel A et al. An introduction to matrix concentration inequalities. *Foundations and Trends® in Machine Learning*, 8(1-2):1–230, 2015.
- Vershynin, Roman. A note on sums of independent random matrices after ahlsvede-winter. *Lecture notes*, 2009.
